# Supplementary material for: Fast Tac Metabolizers at Risk—It is Time for a C/D Ratio Calculation
Source: PubMed Central journal article supplement (PMC6572069; doi:10.3390/jcm8050587), 2019-04-28
Supplement: jcm-08-00587-s001.pdf [file jcm-08-00587-s001.pdf]

## Supplementary Material

|                       | 3-month C/D ratio | Average C/D ratio<br>(month 1 and 6) | p-value |
|-----------------------|-------------------|--------------------------------------|---------|
| <b>Median</b>         | 1,29              | 1,19                                 | 0.765   |
| <b>25% percentile</b> | 0,87              | 0,82                                 |         |
| <b>75% percentile</b> | 2,00              | 1,96                                 |         |

**Supplemental Table S1.** The average C/D ratio of month one and six for 50 randomly selected patients did not differ from the 3-month C/D ratio, suggesting that 3-month C/D ratio strongly correlated with the average C/D ratio during month one and six. P-value of Mann-Whitney U test is given.

| 3-month C/D ratio | Average C/D ratio (month 1 and 6) |                  |
|-------------------|-----------------------------------|------------------|
|                   | Slow metabolizer                  | Fast metabolizer |
| Slow metabolizer  | 24                                | 1                |
| Fast metabolizer  | 1                                 | 24               |

**Supplemental Table S2.** Categorization of slow and fast Tac metabolizers was similar when applying the 3-month C/D ratio or the average C/D ratio of month one and six ( $p=1.000$ , Fisher's exact test).
